# Supplementary material for: The noncoding small RNA SsrA is released by Vibrio fischeri and modulates critical host responses
Source: PLoS Biol. 2020 Nov 3;18(11):e3000934. doi: 10.1371/journal.pbio.3000934 (PMC7665748; doi:10.1371/journal.pbio.3000934)
Supplement: S7 Data — Sheet 1: Survival proportion of juvenile squid that were either single-colonized by WT or ΔssrA, or co-colonized at a 1:1 inoculum ratio with both WT and ΔssrA (n = 60). S6C Fig. Sheet 2: Respiration rates of newly hatched squid (“Hatch”), or of animals after 24 h, that were either maintained APO or colonized by WT, ΔssrA, or Δlux strains. S6D Fig. Sheet 3: Internal yolk-sac area values, 2 d post colonization with WT, ΔssrA, its complement (ΔssrA + ssrA), the nonluminescent mutant (Δlux), or ΔsmpB strains. S6E Fig. Sheet 4: Quantification of laccase-3 signal by HCR using relative fluorescence intensity of a Z-series image of the light organ. S7A Fig. Sheet 5: Quantification of laccase-3 presence by HCR fluorescence signal intensity from a Z-series image of light organs, 3 h after incubation with WT or ΔssrA OMVs. S7B Fig. APO, aposymbiotic; HCR, hybridization chain reaction; OMV, outer membrane vesicle; WT, wild type. (XLSX) [file pbio.3000934.s016.xlsx]

## Sheet: FigS6C-survival porportion
Days	WT	ΔssrA	ΔssrA vs WT
0	100	100	100
1.5		97.3684
3		94.7368
3.5		86.8421
4	98.6301	81.5789	98.6111
4.5	94.5205	73.6842	94.4444
5	83.5616	56.5789	84.7222

## Sheet: FigS6D
APO	ΔssrA	WT	Δlux	Hatch
4.584	1.179	1.425	5.472	4.129
1.816	0.809	1.035	1.318	7.127
2.635	1.525	1.154	1.968	2.572
2.155	1.742	0.169	0.214	1.486
5.864	4.829	1.648	6.757	7.373
2.646	6.76	6.685	6.937
7.194	4.263	3.248	6.762
6.055	2.283	4.891	3.942
7.517	6.418	1.581	8.177
2.537	6.162	3.158	2.181
1.753	4.8	3.158	6.811
4.172		0.88

## Sheet: FigS6E
WT	ΔssrA	ΔssrA + ssrA	Δlux	ΔsmpB
28086.4	53496.7	39750.1	34059.2	56286.6
39727.1	25342.9	48533.5	66127	83810.5
43920.1	23973.8	63254.7	33511.6	39122
46329.4	34984.8	58264.8	58180.4	88246.9
46645.4	19717.1	37718.5	31114.2	40644.3
47280.4	18035.4	80273.1	68962.3	63582.6
51886.3	21044.1	90192.7	113310	33249.2
54209	31875.6	42461.5	40759.2	51323.4
59427	15584.9	76696.9	79329.8	36211.5
67628.2	13355.7	50609.1	38124.4	34331.1
70352.2	54584.6	42497.2	40004.3	58321.1
76317.1	29588.2	56464.1	62474	71669
82732.2	20562.1	64190.3	109355	68787.8
85715.8	35541.9	36470.4	78517.4	72198
87611.1	25137	173860	82360.8	72276.7
93114.5	27449.9	138206	38029.1	45665.3
99749.1	34078.8	35924.5	47398.5	51551.5

## Sheet: FigS7A
APO	WT	ΔssrA	ΔsmpB
85675	67605	108102	85447
94454	29437	72482	48621
86268	12540	70864	77384
109983	9090	60965	58049
137233	34164	122582	37098
84395	46924	102711	69217
133764	26070	87982	59759
114909	61367	108470	70805
142587	41342	135007	59235
96975	31524	117422	25606
	58004	89090	69432
	41166	104391	42535
	49188	83930	29134
	58186		30396

## Sheet: FigS7B
APO	WT	ΔssrA
23068672	17825792	22544384
18874368	17301504	23330816
18350080	20971520	20971520
22020096	23330816	24641536
23592960	20185088	19922944
23068672	18350080	46137344
19398656	23592960	25165824
17039360	24641536	34641536
21757952	25427968	20330816
25165824	23330816	29715200
